# Supplementary material for: 2p–4f one-dimensional chains and two-dimensional networks assembled by a multicoordinating nitronyl nitroxide radical ligand
Source: Royal Society of Chemistry journal article supplement (doi:10.1039/d4ce00764f), 2024-01-01
Supplement: d4ce00764f1.pdf [file d4ce00764f1.pdf]

## Supporting Information

### ***2p-4f* one-dimensional chains and two-dimensional networks assembled by multicoordinating nitronyl nitroxide radical ligand**

Juan Sun,\* Yuqing Fang, Sisi Liao, Tong Luo, Shixun Gao, Zhenhua Qiao, Jie Yang  
Hubei Key Laboratory of Pollutant Analysis & Reuse Technology, College of  
Chemistry and Chemical Engineering, Hubei Normal University, Huangshi 435002, P.  
R. China. \*E-mail: sunjuan@hbnu.edu.cn

**Table S1** Selected bond lengths [ $\text{\AA}$ ] and angles [ $^\circ$ ] for **1**.

| <i>Bond distances</i> |            |                 |            |
|-----------------------|------------|-----------------|------------|
| Tb(1)-O(6)            | 2.3824(15) | Tb(1)-O(4)      | 2.4806(15) |
| Tb(1)-O(2)            | 2.4002(16) | Tb(1)-N(3)      | 2.5274(19) |
| Tb(1)-O(1)            | 2.4019(16) | Tb(1)-N(2)      | 2.5764(19) |
| Tb(1)-O(3)            | 2.4042(16) | N(6)-O(9)       | 1.271(3)   |
| Tb(1)-O(5)            | 2.4443(16) | N(5)-O(8)       | 1.288(3)   |
| Tb(1)-O(7)            | 2.4544(17) |                 |            |
| <i>Angles</i>         |            |                 |            |
| O(6)-Tb(1)-O(2)       | 137.65(5)  | O(3)-Tb(1)-O(4) | 68.35(5)   |
| O(6)-Tb(1)-O(1)       | 141.10(5)  | O(5)-Tb(1)-O(4) | 125.01(5)  |
| O(2)-Tb(1)-O(1)       | 70.22(6)   | O(7)-Tb(1)-O(4) | 128.98(6)  |
| O(6)-Tb(1)-O(3)       | 136.01(5)  | O(6)-Tb(1)-N(3) | 76.60(6)   |
| O(2)-Tb(1)-O(3)       | 70.10(6)   | O(2)-Tb(1)-N(3) | 74.20(6)   |
| O(1)-Tb(1)-O(3)       | 70.75(6)   | O(1)-Tb(1)-N(3) | 141.67(6)  |
| O(6)-Tb(1)-O(5)       | 72.12(5)   | O(3)-Tb(1)-N(3) | 84.25(6)   |
| O(2)-Tb(1)-O(5)       | 108.60(6)  | O(5)-Tb(1)-N(3) | 133.89(6)  |
| O(1)-Tb(1)-O(5)       | 72.58(5)   | O(7)-Tb(1)-N(3) | 70.42(6)   |
| O(3)-Tb(1)-O(5)       | 141.17(6)  | O(4)-Tb(1)-N(3) | 69.39(6)   |
| O(6)-Tb(1)-O(7)       | 73.31(6)   | O(6)-Tb(1)-N(2) | 81.06(6)   |
| O(2)-Tb(1)-O(7)       | 68.38(6)   | O(2)-Tb(1)-N(2) | 140.02(6)  |
| O(1)-Tb(1)-O(7)       | 108.01(6)  | O(1)-Tb(1)-N(2) | 71.09(6)   |
| O(3)-Tb(1)-O(7)       | 135.73(6)  | O(3)-Tb(1)-N(2) | 88.02(6)   |
| O(5)-Tb(1)-O(7)       | 68.68(6)   | O(5)-Tb(1)-N(2) | 68.26(6)   |
| O(6)-Tb(1)-O(4)       | 67.89(5)   | O(7)-Tb(1)-N(2) | 134.79(6)  |
| O(2)-Tb(1)-O(4)       | 126.39(5)  | O(4)-Tb(1)-N(2) | 69.57(6)   |
| O(1)-Tb(1)-O(4)       | 123.01(5)  | N(3)-Tb(1)-N(2) | 138.19(6)  |

**Table S2** Selected bond lengths [ $\text{\AA}$ ] and angles [ $^\circ$ ] for **2**.

| <i>Bond distances</i> |            |                 |            |
|-----------------------|------------|-----------------|------------|
| Dy(1)-O(6)            | 2.3712(18) | Dy(1)-O(4)      | 2.4643(18) |
| Dy(1)-O(1)            | 2.3902(18) | Dy(1)-N(3)      | 2.512(2)   |
| Dy(1)-O(2)            | 2.392(2)   | Dy(1)-N(2)      | 2.561(2)   |
| Dy(1)-O(3)            | 2.392(2)   | N(6)-O(9)       | 1.279(4)   |
| Dy(1)-O(5)            | 2.4339(19) | N(5)-O(8)       | 1.283(4)   |
| Dy(1)-O(7)            | 2.450(2)   |                 |            |
| <i>Angles</i>         |            |                 |            |
| O(6)-Dy(1)-O(1)       | 140.91(6)  | O(6)-Dy(1)-O(2) | 137.45(6)  |
| O(6)-Dy(1)-O(2)       | 137.41(7)  | O(6)-Dy(1)-O(3) | 136.30(6)  |
| O(1)-Dy(1)-O(2)       | 70.37(7)   | O(2)-Dy(1)-O(3) | 70.11(7)   |
| O(6)-Dy(1)-O(3)       | 136.30(7)  | O(1)-Dy(1)-O(5) | 72.26(7)   |
| O(1)-Dy(1)-O(3)       | 70.77(7)   | O(3)-Dy(1)-O(5) | 141.11(7)  |
| O(2)-Dy(1)-O(3)       | 70.18(7)   | O(3)-Dy(1)-O(4) | 68.65(6)   |
| O(6)-Dy(1)-O(5)       | 72.33(7)   | O(5)-Dy(1)-O(4) | 125.48(7)  |
| O(1)-Dy(1)-O(5)       | 72.29(7)   | O(7)-Dy(1)-O(4) | 128.93(7)  |
| O(2)-Dy(1)-O(5)       | 107.86(7)  | O(6)-Dy(1)-N(3) | 76.51(7)   |
| O(3)-Dy(1)-O(5)       | 141.15(7)  | O(1)-Dy(1)-N(3) | 141.90(7)  |
| O(6)-Dy(1)-O(7)       | 73.40(7)   | O(2)-Dy(1)-N(3) | 74.24(7)   |
| O(1)-Dy(1)-O(7)       | 107.92(7)  | O(3)-Dy(1)-N(3) | 84.45(8)   |
| O(2)-Dy(1)-O(7)       | 67.90(8)   | O(5)-Dy(1)-N(3) | 133.54(8)  |
| O(3)-Dy(1)-O(7)       | 135.35(8)  | O(7)-Dy(1)-N(3) | 70.13(8)   |
| O(5)-Dy(1)-O(7)       | 68.47(7)   | O(4)-Dy(1)-N(3) | 69.47(7)   |
| O(6)-Dy(1)-O(4)       | 67.89(6)   | O(6)-Dy(1)-N(2) | 80.75(7)   |
| O(1)-Dy(1)-O(4)       | 123.15(7)  | O(1)-Dy(1)-N(2) | 71.18(7)   |
| O(2)-Dy(1)-O(4)       | 126.66(7)  | O(2)-Dy(1)-N(2) | 140.40(7)  |

**Table S3** Selected bond lengths [ $\text{\AA}$ ] and angles [ $^\circ$ ] for **3**.

| <i>Bond distances</i> |           |                 |           |
|-----------------------|-----------|-----------------|-----------|
| Pr(1)-O(3)            | 2.491(10) | Pr(1)-O(7)      | 2.528(10) |
| Pr(1)-O(5)            | 2.473(11) | Pr(1)-N(3)      | 2.650(11) |
| Pr(1)-O(6)            | 2.475(11) | Pr(1)-N(2)      | 2.679(13) |
| Pr(1)-O(2)            | 2.508(11) | O(7)-N(5)       | 1.281(15) |
| Pr(1)-O(4)            | 2.510(11) | N(6)-O(8)       | 1.261(16) |
| Pr(1)-O(1)            | 2.534(11) |                 |           |
| <i>Angles</i>         |           |                 |           |
| O(3)-Pr(1)-O(5)       | 118.9(4)  | O(4)-Pr(1)-O(7) | 130.9(3)  |
| O(3)-Pr(1)-O(6)       | 126.0(3)  | O(1)-Pr(1)-O(7) | 63.1(3)   |
| O(5)-Pr(1)-O(6)       | 69.4(4)   | O(3)-Pr(1)-N(3) | 70.7(4)   |
| O(3)-Pr(1)-O(2)       | 73.4(3)   | O(5)-Pr(1)-N(3) | 137.7(4)  |
| O(5)-Pr(1)-O(2)       | 149.8(4)  | O(6)-Pr(1)-N(3) | 72.8(4)   |
| O(6)-Pr(1)-O(2)       | 128.3(4)  | O(2)-Pr(1)-N(3) | 71.3(4)   |
| O(3)-Pr(1)-O(4)       | 67.1(3)   | O(4)-Pr(1)-N(3) | 75.1(4)   |
| O(5)-Pr(1)-O(4)       | 72.7(4)   | O(1)-Pr(1)-N(3) | 133.0(4)  |
| O(6)-Pr(1)-O(4)       | 65.9(4)   | O(7)-Pr(1)-N(3) | 82.9(4)   |
| O(2)-Pr(1)-O(4)       | 134.6(3)  | O(3)-Pr(1)-N(2) | 68.3(4)   |
| O(3)-Pr(1)-O(1)       | 118.6(3)  | O(5)-Pr(1)-N(2) | 73.1(4)   |
| O(5)-Pr(1)-O(1)       | 81.5(4)   | O(6)-Pr(1)-N(2) | 141.9(4)  |
| O(6)-Pr(1)-O(1)       | 115.5(4)  | O(2)-Pr(1)-N(2) | 88.5(4)   |
| O(2)-Pr(1)-O(1)       | 68.8(3)   | O(4)-Pr(1)-N(2) | 96.8(4)   |
| O(4)-Pr(1)-O(1)       | 151.9(4)  | O(1)-Pr(1)-N(2) | 64.2(4)   |
| O(3)-Pr(1)-O(7)       | 143.0(3)  | O(7)-Pr(1)-N(2) | 127.3(4)  |
| O(5)-Pr(1)-O(7)       | 98.1(4)   | N(3)-Pr(1)-N(2) | 138.0(4)  |
| O(6)-Pr(1)-O(7)       | 65.8(3)   | N(5)-O(7)-Pr(1) | 147.8(9)  |
| O(2)-Pr(1)-O(7)       | 73.9(3)   |                 |           |

**Table S4** Selected bond lengths [ $\text{\AA}$ ] and angles [ $^\circ$ ] for **4**.

| <i>Bond distances</i> |            |                 |            |
|-----------------------|------------|-----------------|------------|
| Nd(1)-O(6)            | 2.462(6)   | Nd(1)-O(1)      | 2.517(6)   |
| Nd(1)-O(5)            | 2.468(6)   | Nd(1)-N(3)      | 2.617(6)   |
| Nd(1)-O(2)            | 2.479(6)   | Nd(1)-N(2)      | 2.657(7)   |
| Nd(1)-O(3)            | 2.497(5)   | O(7)-N(5)       | 1.298(8)   |
| Nd(1)-O(4)            | 2.503(6)   | N(6)-O(8)       | 1.270(8)   |
| Nd(1)-O(7)            | 2.509(5)   |                 |            |
| <i>Angles</i>         |            |                 |            |
| O(6)-Nd(1)-O(5)       | 69.54(18)  | O(4)-Nd(1)-O(1) | 151.33(18) |
| O(6)-Nd(1)-O(2)       | 129.21(18) | O(7)-Nd(1)-O(1) | 63.20(17)  |
| O(5)-Nd(1)-O(2)       | 149.24(18) | O(6)-Nd(1)-N(3) | 72.91(19)  |
| O(6)-Nd(1)-O(3)       | 126.18(18) | O(5)-Nd(1)-N(3) | 138.04(19) |
| O(5)-Nd(1)-O(3)       | 118.78(19) | O(2)-Nd(1)-N(3) | 71.68(19)  |
| O(2)-Nd(1)-O(3)       | 72.79(19)  | O(3)-Nd(1)-N(3) | 70.93(19)  |
| O(6)-Nd(1)-O(4)       | 65.35(19)  | O(4)-Nd(1)-N(3) | 75.03(19)  |
| O(5)-Nd(1)-O(4)       | 72.84(19)  | O(7)-Nd(1)-N(3) | 82.99(19)  |
| O(2)-Nd(1)-O(4)       | 134.61(18) | O(1)-Nd(1)-N(3) | 133.55(19) |
| O(3)-Nd(1)-O(4)       | 67.68(19)  | O(6)-Nd(1)-N(2) | 141.35(19) |
| O(6)-Nd(1)-O(7)       | 65.99(18)  | O(5)-Nd(1)-N(2) | 72.44(19)  |
| O(5)-Nd(1)-O(7)       | 98.04(18)  | O(2)-Nd(1)-N(2) | 88.15(19)  |
| O(2)-Nd(1)-O(7)       | 74.57(18)  | O(3)-Nd(1)-N(2) | 68.29(19)  |
| O(3)-Nd(1)-O(7)       | 143.15(18) | O(4)-Nd(1)-N(2) | 97.02(19)  |
| O(4)-Nd(1)-O(7)       | 130.54(18) | O(7)-Nd(1)-N(2) | 127.19(18) |
| O(6)-Nd(1)-O(1)       | 115.30(18) | O(1)-Nd(1)-N(2) | 64.00(19)  |
| O(5)-Nd(1)-O(1)       | 80.64(19)  | N(3)-Nd(1)-N(2) | 138.3(2)   |
| O(2)-Nd(1)-O(1)       | 69.31(18)  | N(5)-O(7)-Nd(1) | 147.6(4)   |
| O(3)-Nd(1)-O(1)       | 118.53(18) |                 |            |

**Table S5** SHAPE analysis for the Ln coordination spheres.

| Compound    | JCSAPR-9 | CSAPR-9      | TCTPR-9 | MFF-9        |
|-------------|----------|--------------|---------|--------------|
| <b>1 Tb</b> | 1.383    | <b>0.232</b> | 1.284   | 0.797        |
| <b>2 Dy</b> | 1.398    | <b>0.239</b> | 1.328   | 0.776        |
| <b>3 Pr</b> | 3.020    | 1.627        | 2.156   | <b>1.144</b> |
| <b>4 Nd</b> | 2.924    | 1.584        | 2.145   | <b>1.113</b> |

JCSAPR-9 = Capped square antiprism J10 ( $C_{4v}$ ); CSAPR-9 = Spherical capped square antiprism ( $C_{4v}$ ); TCTPR-9 = Spherical tricapped trigonal prism ( $D_{3h}$ ); MFF-9 = Muffin ( $C_s$ ).

**Table S6** Distances (Å) and angles (°) for the hydrogen bonds in **1–2**.

| D–H···A         | Compounds   | d(D–H) | d(H···A) | d(D···A) | <(DHA) |
|-----------------|-------------|--------|----------|----------|--------|
| O7–<br>H7B···O7 | <b>1 Tb</b> | 0.853  | 1.982    | 2.778    | 154.99 |
| O7–<br>H7B···O7 | <b>2 Dy</b> | 0.862  | 1.963    | 2.771    | 155.54 |

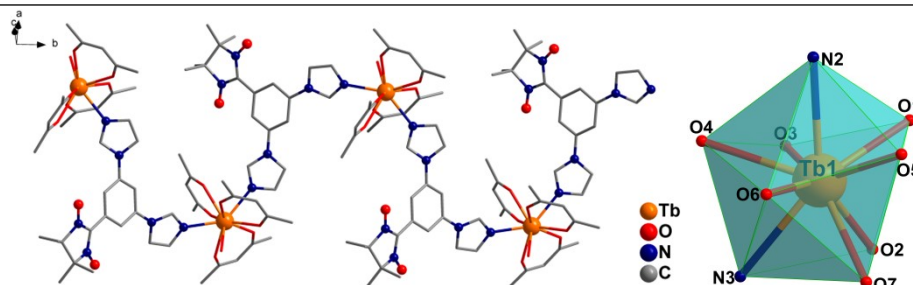

**Fig. S1** (left) 1D structure of compound **1**. (right) The coordination polyhedra for Tb center (all F atoms, H atoms and Et<sub>2</sub>O solvent molecules are omitted).

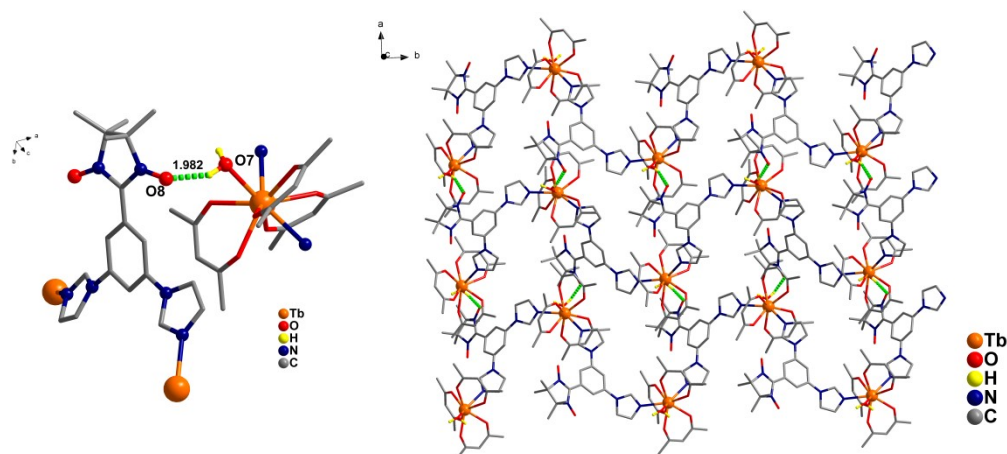

**Fig. S2** (left) The hydrogen-bonded Tb–O<sub>water</sub>–H···O<sub>rad</sub> motif in compound **1**. (right) 2D layer structure results from the hydrogen-bonding interactions in **1** (all F atoms, partial H atoms and Et<sub>2</sub>O solvent molecules are omitted).

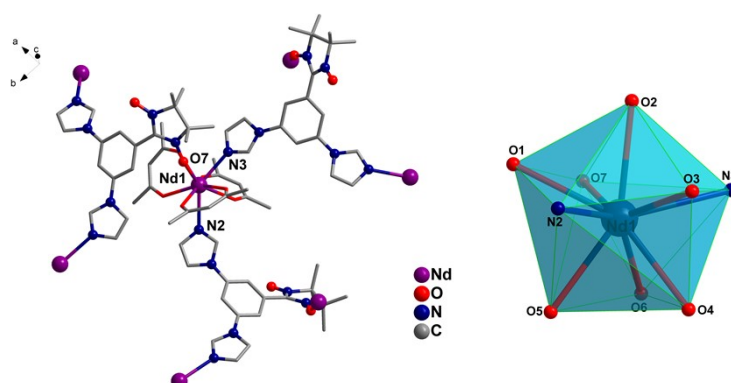

**Fig. S3.** (left) View of coordination environment of Nd(III) ion in compound **4**.  
(right) Coordination polyhedra of the Nd(III) ions (all F and H atoms are omitted).

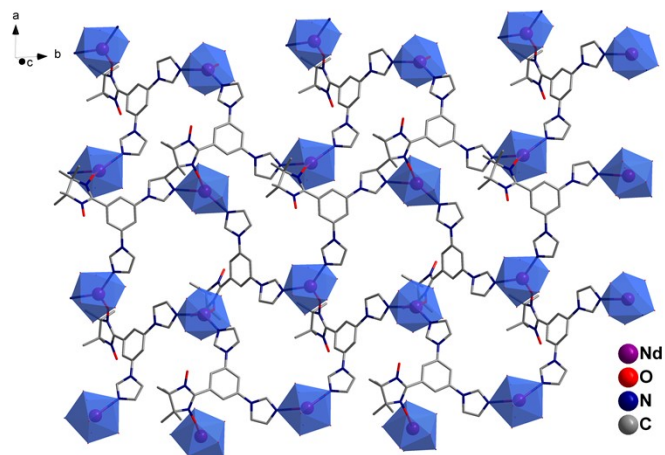

**Fig. S4** 2D structure of compound **4** (all F atoms, H atoms and hfac molecules are omitted).

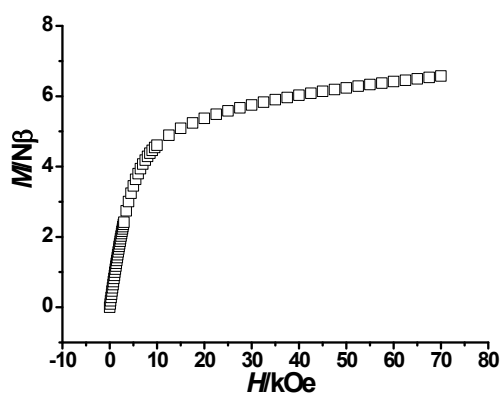

**Fig. S5**  $M$  versus  $H$  curve for compound **1** at 2.0 K.

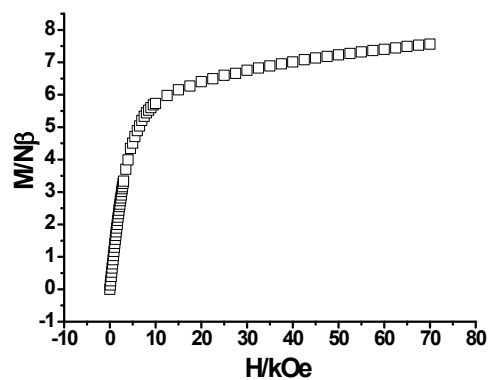

**Fig. S6**  $M$  versus  $H$  curve for compound **2** at 2.0 K.

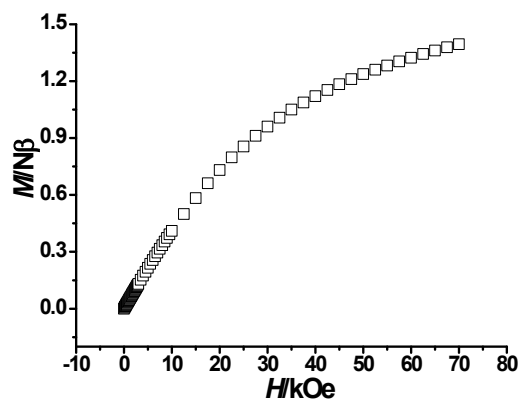

**Fig. S7**  $M$  versus  $H$  curve for compound **3** at 2.0 K.

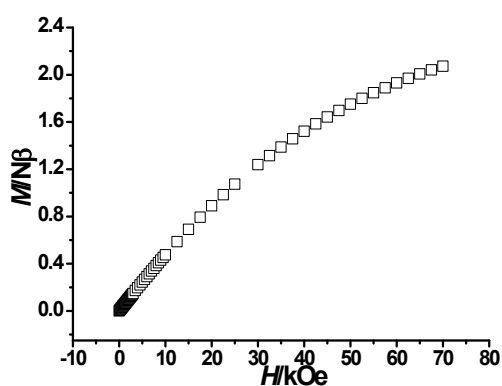

**Fig. S8**  $M$  versus  $H$  curve for compound **4** at 2.0 K.

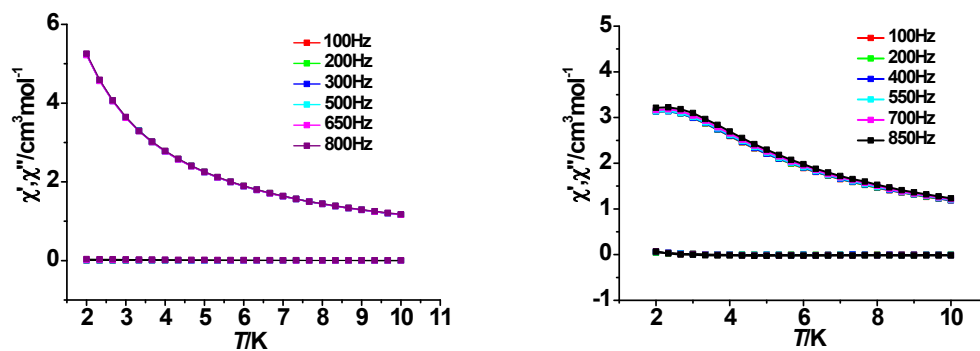

**Fig. S9** Temperature dependence of the in-phase and out-of-phase components of the ac magnetic susceptibility in zero field (left) and 2500 Oe dc field (right) for compound **1**.



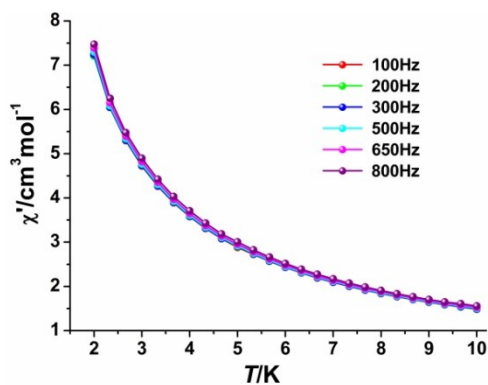

**Fig. S10** Temperature dependence of the in-phase component of the ac magnetic susceptibility in zero field for compound **2**.

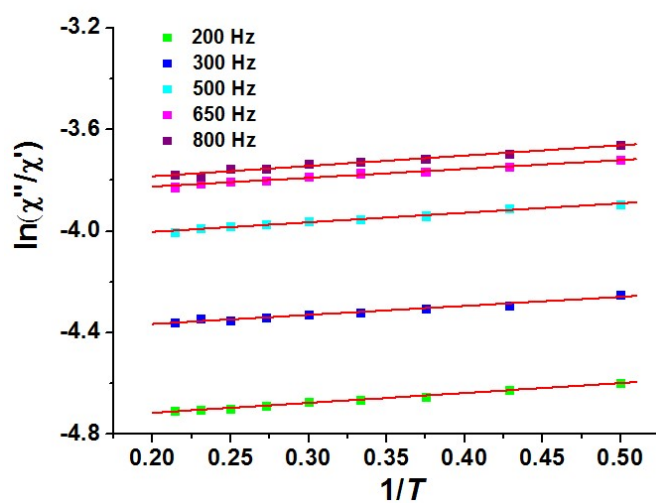

**Fig. S11** Plots of  $\ln(\chi''/\chi')$  versus  $1/T$  of **2**, the solid line represents the fitting results.

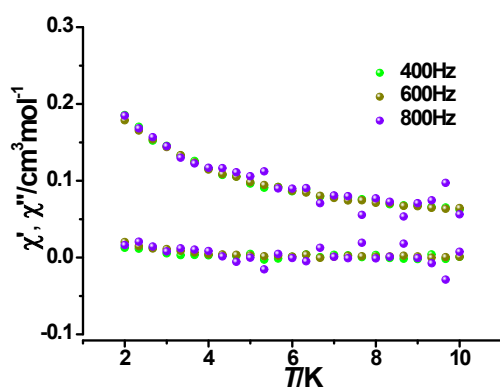

**Fig. S12** Temperature dependence of the in-phase and out-of-phase components of the ac magnetic susceptibility under 3000 Oe dc field for compound **3**.

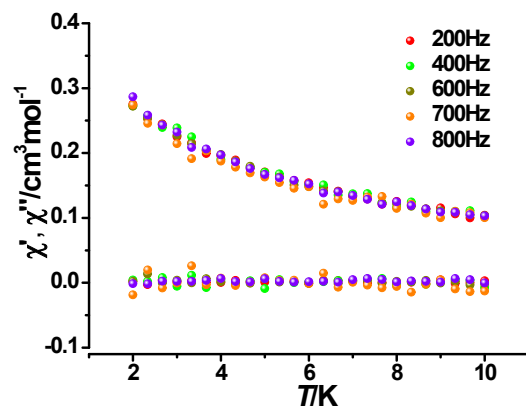

**Fig. S13** Temperature dependence of the in-phase and out-of-phase components of the ac magnetic susceptibility under 3000 Oe dc field for compound 4.
